# Supplementary material for: Distinct Microbiotas Are Associated with Different Production Lines in the Cutting Room of a Swine Slaughterhouse
Source: Microorganisms. 2023 Jan 4;11(1):133. doi: 10.3390/microorganisms11010133 (PMC9862343; doi:10.3390/microorganisms11010133)
Supplement: Supplementary file 1 [file microorganisms-11-00133-s001.zip]

Archive with 7 entries (7 files):
- Supplementary_Figures_Text.pdf
- Table S1. OTUs positively associated with visit according to the MaAsLin test.pdf
- Table S2 OTUs negatively associated with visit according to the MaAsLin test.pdf
- Table S3 OTUs positively associated with production line according to the MaAsLin test.pdf
- Table S4 OTUs negatively associated with production line according to the MaAsLin test.pdf
- Table S5 OTUs hierarchized according to their mean importance for the identification of a visit in the random forest visit model.pdf
- Table S6 OTUs hierarchized according to their mean importance for the identification of a production line in the random forest production line model.pdf
