# Supplementary material for: Distinct Microbiotas Are Associated with Different Production Lines in the Cutting Room of a Swine Slaughterhouse
Source: Microorganisms. 2023 Jan 4;11(1):133. doi: 10.3390/microorganisms11010133 (PMC9862343; doi:10.3390/microorganisms11010133)
Supplement: Supplementary file 1 [file microorganisms-11-00133-s001.zip › Table S1. OTUs positively associated with visit according to the MaAsLin test.pdf]

| Visit | Bacterial Genus and OTU                                                                                                                                                                                                                                                                                                                                                                                                                                                                                                                                                                                                                                                                                                                                                                                                                                                                                                                                                                                                                                                                                                                                                                     |
|-------|---------------------------------------------------------------------------------------------------------------------------------------------------------------------------------------------------------------------------------------------------------------------------------------------------------------------------------------------------------------------------------------------------------------------------------------------------------------------------------------------------------------------------------------------------------------------------------------------------------------------------------------------------------------------------------------------------------------------------------------------------------------------------------------------------------------------------------------------------------------------------------------------------------------------------------------------------------------------------------------------------------------------------------------------------------------------------------------------------------------------------------------------------------------------------------------------|
| V2    | <i>Actinomycetaceae_unclassified_99__Otu00164</i><br><b><i>Porphyromonas_Otu00295</i></b><br><i>Comamonadaceae_unclassified_70__Otu00050</i><br><i>Bacteria_unclassified_Otu00085</i><br><b><i>Porphyromonadaceae_unclassified_84__Otu00220</i></b><br><i>Porphyromonas_Otu00052</i><br><i>Peptococcus_Otu00149</i><br><i>Prevotella_Otu00283</i><br><i>Porphyromonas_Otu00028</i><br><b><i>Actinomycetales_unclassified_51__Otu00306</i></b><br><i>Lactobacillales_unclassified_99__Otu00066</i><br><b><i>Listeria_80__Otu00067</i></b>                                                                                                                                                                                                                                                                                                                                                                                                                                                                                                                                                                                                                                                    |
| V3    | <i>Porphyromonas_Otu00028</i><br><b><i>Porphyromonas_Otu00193</i></b><br><b><i>Sandaracinobacter_Otu00158</i></b><br><i>Clostridiales_Incertae_Sedis_XI_unclassified_Otu00221</i><br><i>Flavobacteriaceae_unclassified_Otu00091</i><br><i>Paracoccus_99__Otu00036</i><br><i>Porphyromonas_Otu00052</i><br><b><i>Brevundimonas_Otu00060</i></b><br><i>Rhizobiaceae_unclassified_82__Otu00077</i><br><b><i>Prevotella_Otu00495</i></b><br><i>Psychrobacter_Otu00047</i><br><b><i>Porphyromonas_Otu00013</i></b><br><i>Roseomonas_99__Otu00328</i><br><i>Acinetobacter_Otu00084</i><br><b><i>Sphingobacterium_Otu00294</i></b><br><i>Roseomonas_Otu00311</i><br><i>Flavobacterium_Otu00354</i><br><i>Peptococcus_Otu00149</i><br><b><i>Rhodobacteraceae_unclassified_Otu00124</i></b><br><i>Xanthobacteraceae_unclassified_67__Otu00174</i><br><i>Clostridiales_unclassified_99__Otu00107</i><br><i>Caulobacter_Otu00156</i><br><b><i>Phenyllobacterium_99__Otu00229</i></b><br><i>Peptoniphilus_Otu00213</i><br><i>Janthinobacterium_88__Otu00027</i><br><i>Comamonadaceae_unclassified_70__Otu00050</i><br><i>Fretibacterium_Otu00263</i><br><i>Comamonadaceae_unclassified_95__Otu00114</i> |

**Devosia\_Otu00405**

*Clostridiales\_unclassified\_Otu00131*

*Rhodobacteraceae\_unclassified\_97\_\_Otu00133*

*Amaricoccus\_99\_\_Otu00139*

*Pseudomonas\_Otu00173*

*Azospira\_Otu00476*

*Parvimonas\_Otu00014*

*Mycoplasma\_Otu00115*

*Sphingobium\_98\_\_Otu00048*

**Coriobacteriaceae\_unclassified\_Otu00110**

*Rhizobiales\_unclassified\_98\_\_Otu00276*

---

V4

**Bergeyella\_Otu00282**

*Chryseobacterium\_Otu00025*

*Psychrobacter\_Otu00047*

*Janthinobacterium\_88\_\_Otu00027*

*Flavobacterium\_Otu00138*

*Aerococcaceae\_unclassified\_99\_\_Otu00015*

**Chryseobacterium\_96\_\_Otu00184**

**Aquabacterium\_59\_\_Otu00222**

**Polaromonas\_60\_\_Otu00078**

*Acinetobacter\_Otu00084*

*Epilithonimonas\_86\_\_Otu00031*

*Clostridiales\_unclassified\_99\_\_Otu00107*

*Lactobacillus\_Otu00092*

*Comamonadaceae\_unclassified\_70\_\_Otu00050*

*Ruminococcus2\_80\_\_Otu00338*

**Neisseria\_75\_\_Otu00103**

*Flavobacteriaceae\_unclassified\_Otu00091*

**Fusobacterium\_Otu00086**

*Aerococcaceae\_unclassified\_Otu00010*

*Peptoniphilus\_Otu00213*

**Clostridiales\_unclassified\_Otu00470**

*Sphingobium\_98\_\_Otu00048*

**Xanthomonadaceae\_unclassified\_Otu00195**

*Actinobacillus\_52\_\_Otu00187*

*Streptococcus\_Otu00024*

*Altererythrobacter\_79\_\_Otu00051*

**Moraxellaceae\_unclassified\_Otu00349**

**Xanthomonadaceae\_unclassified\_65\_\_Otu00302**

**Dietzia\_Otu00398**

---

*Amaricoccus\_99\_\_Otu00139*

*Clostridiales\_Incertae\_Sedis\_XI\_unclassified\_Otu00221*  
*Rhizobiaceae\_unclassified\_82\_\_Otu00077*  
*Comamonadaceae\_unclassified\_95\_\_Otu00114*  
*Lysobacter\_99\_\_Otu00057*  
*Peptococcus\_Otu00149*  
*Enterococcus\_77\_\_Otu00071*  
*Caulobacter\_Otu00156*  
*Azospira\_Otu00476*  
***Brevundimonas\_Otu00101***

---

V5

***Corynebacterium\_Otu00344***  
*Porphyromonas\_Otu00028*  
*Actinomycetaceae\_unclassified\_99\_\_Otu00164*  
***Photobacterium\_Otu00162***  
***Clostridiales\_unclassified\_Otu00336***  
*Aerococcaceae\_unclassified\_99\_\_Otu00015*  
*Peptococcus\_Otu00149*  
*Clostridiales\_unclassified\_99\_\_Otu00107*  
*Flavobacterium\_Otu00160*  
*Xanthobacteraceae\_unclassified\_67\_\_Otu00174*  
*Janthinobacterium\_88\_\_Otu00027*  
*Campylobacter\_Otu00197*  
*Rhodobacteraceae\_unclassified\_97\_\_Otu00133*  
***Chitinophagaceae\_unclassified\_Otu00244***  
*Lactobacillales\_unclassified\_99\_\_Otu00066*  
*Epilithonimonas\_86\_\_Otu00031*  
*Mycoplasma\_Otu00115*  
*Pseudomonas\_Otu00173*  
*Flavobacteriaceae\_unclassified\_Otu00091*  
***Anaerococcus\_Otu00383***  
*Aerococcaceae\_unclassified\_Otu00010*  
*Porphyromonas\_Otu00052*  
*Lactobacillus\_Otu00092*  
*Psychrobacter\_Otu00047*  
*Enterococcus\_77\_\_Otu00071*  
*Amaricoccus\_99\_\_Otu00139*  
***Brachybacterium\_99\_\_Otu00151***  
*Flavobacterium\_Otu00354*  
***Eubacterium\_Otu00097***  
*Prevotella\_Otu00283*  
***Kurthia\_99\_\_Otu00120***  
*Duganella\_96\_\_Otu00106*

*Clostridiales\_Incertae\_Sedis\_XI\_unclassified\_Otu00221*  
*Paracoccus\_99\_\_Otu00036*  
*Altererythrobacter\_79\_\_Otu00051*  
*Comamonadaceae\_unclassified\_95\_\_Otu00114*  
*Azospira\_Otu00476*  
*Caulobacter\_Otu00156*  
*Ruminococcus2\_80\_\_Otu00338*  
*Roseomonas\_99\_\_Otu00328*  
*Clostridiales\_unclassified\_Otu00131*  
*Chryseobacterium\_Otu00025*  
*Roseomonas\_Otu00311*  
***Sphingomonadaceae\_unclassified\_91\_\_Otu00239***  
*Rhizobiales\_unclassified\_98\_\_Otu00276*  
***Bosea\_Otu00219***  
***Brochothrix\_Otu00245***  
***Sphingomonas\_Otu00043***  
*Flavobacterium\_Otu00138*

---

V6

*Parvimonas\_Otu00014*  
*Flavobacterium\_Otu00160*  
***Bacteria\_unclassified\_Otu00404***  
*Psychrobacter\_Otu00047*  
*Aerococcaceae\_unclassified\_99\_\_Otu00015*  
*Rhodobacteraceae\_unclassified\_97\_\_Otu00133*  
*Lactobacillales\_unclassified\_99\_\_Otu00066*  
*Amaricoccus\_99\_\_Otu00139*  
*Flavobacterium\_Otu00354*  
*Lactobacillus\_Otu00092*  
***Prevotella\_Otu00049***  
*Actinobacillus\_52\_\_Otu00187*  
*Janthinobacterium\_88\_\_Otu00027*  
***Peptoniphilus\_Otu00005***  
*Campylobacter\_Otu00197*  
***Sphaerobacteraceae\_unclassified\_Otu00279***  
***Campylobacter\_Otu00233***  
*Epilithonimonas\_86\_\_Otu00031*  
*Streptococcus\_Otu00024*  
*Ruminococcus2\_80\_\_Otu00338*  
*Duganella\_96\_\_Otu00106*  
*Mycoplasma\_Otu00115*  
*Peptoniphilus\_Otu00213*  


---

*Flavobacterium\_Otu00138*

***Veillonellaceae\_unclassified\_Otu00488***

***Peptostreptococcus\_Otu00018***

*Bacteria\_unclassified\_Otu00085*

*Porphyromonas\_Otu00028*

*Paracoccus\_99\_\_Otu00036*

*Fretibacterium\_Otu00263*

*Lysobacter\_99\_\_Otu00057*

*Prevotella\_Otu00283*

***Fusobacterium\_Otu00035***

---

**Table S1:** OTUs positively associated with visit according to the MaAsLin test. Bacterial genera and OTUs associated with only one visit are identified in bold. 1: Visit one; 2: Visit two; 3: Visit three; 4: Visit four; 5: Visit five; 6: Visit six.
