# Supplementary material for: Distinct Microbiotas Are Associated with Different Production Lines in the Cutting Room of a Swine Slaughterhouse
Source: Microorganisms. 2023 Jan 4;11(1):133. doi: 10.3390/microorganisms11010133 (PMC9862343; doi:10.3390/microorganisms11010133)
Supplement: Supplementary file 1 [file microorganisms-11-00133-s001.zip › Table S2 OTUs negatively associated with visit according to the MaAsLin test.pdf]

| Visit | Bacterial Genus and OTU                                                                                                                                                                                                                                                                                                                                                                                                                                                                                                                                                                                                                                                                                                                                                                              |
|-------|------------------------------------------------------------------------------------------------------------------------------------------------------------------------------------------------------------------------------------------------------------------------------------------------------------------------------------------------------------------------------------------------------------------------------------------------------------------------------------------------------------------------------------------------------------------------------------------------------------------------------------------------------------------------------------------------------------------------------------------------------------------------------------------------------|
| V2    | <i>Prevotella</i> _Otu00117<br><i>Peptostreptococcaceae_unclassified_99__Otu00266</i><br><i>Bacteria_unclassified_Otu00297</i><br><i>Lachnospiraceae_unclassified_Otu00069</i><br><i>Helcococcus_Otu00080</i><br><i>Filifactor_Otu00230</i><br><i>Bacteroides_Otu00009</i><br><i>Helcococcus_Otu00104</i><br><i>Fusobacterium_Otu00001</i><br><i>Pasteurella_83__Otu00121</i><br><i>Streptococcus_Otu00029</i><br><b><i>Parvimonas_Otu00014</i></b><br><i>Tannerella_Otu00210</i><br><i>Fusobacterium_Otu00396</i><br><i>Porphyromonadaceae_unclassified_99__Otu00089</i><br><i>Brochothrix_Otu00245</i><br><i>Clostridiales_unclassified_96__Otu00275</i><br><i>Escherichia_Shigella_Otu00046</i><br><i>Kurthia_99__Otu00120</i><br><i>Bacillales_unclassified_91__Otu00061</i>                     |
| V3    | <i>Prevotella_Otu00117</i><br><i>Lachnospiraceae_unclassified_Otu00069</i><br><i>Peptostreptococcaceae_unclassified_99__Otu00266</i><br><i>Porphyromonadaceae_unclassified_99__Otu00089</i><br><i>Bacilli_unclassified_Otu00224</i><br><i>Bacteria_unclassified_Otu00297</i><br><i>Streptococcus_Otu00029</i><br><i>Helcococcus_Otu00080</i><br><i>Bacteroides_Otu00009</i><br><i>Lactococcus_Otu00132</i><br><i>Filifactor_Otu00230</i><br><i>Peptostreptococcus_Otu00018</i><br><i>Fusobacterium_Otu00396</i><br><b><i>Lactobacillales_unclassified_99__Otu00066</i></b><br><i>Bacillales_unclassified_91__Otu00061</i><br><b><i>Prevotella_Otu00439</i></b><br><i>Fusobacterium_Otu00035</i><br><i>Blastococcus_91__Otu00247</i><br><i>Helcococcus_Otu00181</i><br><i>Enhhydrobacter_Otu00007</i> |

V4     *Prevotella*\_Otu00117  
*Lachnospiraceae\_unclassified*\_Otu00069  
*Bacteria\_unclassified*\_Otu00297  
*Bacteroides*\_Otu00009  
*Peptostreptococcaceae\_unclassified\_99\_\_*Otu00266  
*Bacilli\_unclassified*\_Otu00224  
*Fusobacterium*\_Otu00001  
*Actinomyces*\_Otu00068  
*Escherichia\_Shigella*\_Otu00046  
*Filifactor*\_Otu00230  
*Bacteroides*\_Otu00030  
*Lachnospiraceae\_unclassified*\_Otu00095  
***BPrevotella*\_Otu00049**  
*Helcococcus*\_Otu00104  
*Clostridiales\_Incertae\_Sedis\_XI\_unclassified*\_Otu00218  
*Atopobium*\_Otu00090  
***Coriobacteriaceae\_unclassified*\_Otu00110**  
*Aerococcus*\_Otu00053  
*Bacillales\_unclassified\_91\_\_*Otu00061  
*Pasteurella\_83\_\_*Otu00121  
***Filifactor*\_Otu00137**  
*Lactococcus*\_Otu00132  
*Helcococcus*\_Otu00080  
*Peptostreptococcus*\_Otu00018  
*Bacteroides*\_Otu00017  
*Fusobacterium*\_Otu00035  
*Tannerella*\_Otu00210  
*Porphyromonadaceae\_unclassified\_99\_\_*Otu00089

---

V5     *Prevotella*\_Otu00117  
*Peptostreptococcaceae\_unclassified\_99\_\_*Otu00266  
*Fusobacterium*\_Otu00396  
*Filifactor*\_Otu00230  
*Bacilli\_unclassified*\_Otu00224  
*Streptococcus*\_Otu00029  
*Lachnospiraceae\_unclassified*\_Otu00069  
*Aeromonas*\_Otu00062  
*Bacteroides*\_Otu00009  
*Peptostreptococcus*\_Otu00018  
*Clostridiales\_Incertae\_Sedis\_XI\_unclassified*\_Otu00218  
*Escherichia\_Shigella*\_Otu00046  
*Bacillales\_unclassified\_91\_\_*Otu00061

---

|    |                                                         |
|----|---------------------------------------------------------|
|    | <i>Helcococcus</i> _Otu00181                            |
|    | <i>Blastococcus</i> _91__Otu00247                       |
|    | <i>Aerococcus</i> _Otu00053                             |
|    | <i>Lactococcus</i> _Otu00132                            |
|    | <b><i>Chryseobacterium</i>_Otu00064</b>                 |
|    | <i>Fusobacterium</i> _Otu00001                          |
|    | <i>Porphyromonadaceae_unclassified</i> _99__Otu00089    |
|    | <i>Actinomyces</i> _Otu00068                            |
|    | <i>Helcococcus</i> _Otu00104                            |
| V6 | <i>Prevotella</i> _Otu00117                             |
|    | <i>Peptostreptococcaceae_unclassified</i> _99__Otu00266 |
|    | <i>Bacteria_unclassified</i> _Otu00297                  |
|    | <i>Porphyromonadaceae_unclassified</i> _99__Otu00089    |
|    | <i>Lachnospiraceae_unclassified</i> _Otu00069           |
|    | <i>Escherichia</i> _Shigella_Otu00046                   |
|    | <i>Bacteroides</i> _Otu00017                            |
|    | <b><i>Carnobacterium</i>_58__Otu00055</b>               |
|    | <i>Tannerella</i> _Otu00210                             |
|    | <i>Fusobacterium</i> _Otu00396                          |
|    | <b><i>Pseudomonas</i>_Otu00037</b>                      |
|    | <i>Aeromonas</i> _Otu00062                              |
|    | <i>Kurthia</i> _99__Otu00120                            |
|    | <i>Enhydrobacter</i> _Otu00007                          |
|    | <i>Bacteroides</i> _Otu00009                            |
|    | <i>Streptococcus</i> _Otu00029                          |
|    | <b><i>Brevundimonas</i>_Otu00072</b>                    |
|    | <b><i>Brevundimonas</i>_Otu00101</b>                    |
|    | <i>Brochothrix</i> _Otu00245                            |
|    | <i>Lachnospiraceae_unclassified</i> _Otu00095           |
|    | <i>Fusobacterium</i> _Otu00001                          |
|    | <i>Bacteroides</i> _Otu00030                            |
|    | <i>Atopobium</i> _Otu00090                              |
|    | <i>Clostridiales_unclassified</i> _96__Otu00275         |

Table S2: OTUs negatively associated with visit according to the MaAsLin test. Bacterial genera and OTUs associated with only one visit are identified in bold. 1: Visit one; 2: Visit two; 3: Visit three; 4: Visit four; 5: Visit five; 6: Visit six.
