# Supplementary material for: Distinct Microbiotas Are Associated with Different Production Lines in the Cutting Room of a Swine Slaughterhouse
Source: Microorganisms. 2023 Jan 4;11(1):133. doi: 10.3390/microorganisms11010133 (PMC9862343; doi:10.3390/microorganisms11010133)
Supplement: Supplementary file 1 [file microorganisms-11-00133-s001.zip › Table S3 OTUs positively associated with production line according to the MaAsLin test.pdf]

| <b>Production<br/>line</b> | <b>Bacterial Genus and OTU</b>                                                                                                                                                                                                                                                                                                                                                                                                                                                                                                                                                                                                                                                                                                                                                                                                                                                                                                                                                                                                                                                                                                                                                                                                                                                                                                                                                                                                                                                              |
|----------------------------|---------------------------------------------------------------------------------------------------------------------------------------------------------------------------------------------------------------------------------------------------------------------------------------------------------------------------------------------------------------------------------------------------------------------------------------------------------------------------------------------------------------------------------------------------------------------------------------------------------------------------------------------------------------------------------------------------------------------------------------------------------------------------------------------------------------------------------------------------------------------------------------------------------------------------------------------------------------------------------------------------------------------------------------------------------------------------------------------------------------------------------------------------------------------------------------------------------------------------------------------------------------------------------------------------------------------------------------------------------------------------------------------------------------------------------------------------------------------------------------------|
| CP                         | <i>Rothia_92__Otu00006</i><br><i>Desulfovibrio_Otu00281</i><br><i>Lactobacillales_unclassified_99__Otu00515</i><br><i>Bacteroides_Otu00258</i><br><i>Bacteroidetes_unclassified_Otu00453</i><br><i>Dechloromonas_90__Otu00175</i><br><i>Clostridiaceae_1_unclassified_Otu00082</i><br><i>Streptococcus_Otu00232</i><br><i>Rhodocyclaceae_unclassified_85__Otu00285</i><br><i>Bacteroides_Otu00199</i><br><i>Stenotrophomonas_99__Otu00054</i><br><i>Leucobacter_98__Otu00409</i><br><i>Mannheimia_93__Otu00458</i><br><i>Paludibacter_Otu00166</i><br><i>Flavobacteriaceae_unclassified_Otu00201</i><br><i>Lactococcus_Otu00262</i><br><i>Propionivibrio_96__Otu00373</i><br><i>Gallicola_Otu00249</i><br><i>Deinococcus_Otu00461</i><br><i>Acidaminococcus_Otu00393</i><br><i>Rhodopseudomonas_99__Otu00033</i><br><i>Turicibacter_Otu00058</i><br><i>Polaromonas_60__Otu00078</i><br><i>Soonwooa_Otu00196</i><br><i>Cloacibacterium_Otu00172</i><br><i>Azonexus_Otu00322</i><br><i>Lactobacillus_Otu00099</i><br><i>Romboutsia_Otu00075</i><br><i>Terrisporobacter_Otu00041</i><br><i>Clostridium_sensu_stricto_Otu00016</i><br><i>Microvirgula_Otu00206</i><br><i>Pseudomonas_Otu00179</i><br><i>Bacteroides_Otu00264</i><br><i>Flavobacterium_Otu00480</i><br><i>Clostridium_sensu_stricto_Otu00136</i><br><i>Aerococcaceae_unclassified_Otu00010</i><br><i>Bacteroidales_unclassified_88__Otu00482</i><br><i>Neisseriaceae_unclassified_Otu00442</i><br><i>Brevibacterium_Otu00142</i> |

*Moraxellaceae\_unclassified\_Otu00314*  
*Methanobrevibacter\_Otu00183*  
*Dysgonomonas\_Otu00363*  
*Dysgonomonas\_Otu00484*  
*Lachnospiraceae\_unclassified\_87\_\_Otu00572*  
*Psychrobacter\_Otu00047*  
*Ruminococcaceae\_unclassified\_Otu00154*  
*Porphyromonas\_98\_\_Otu00454*  
*Clostridium\_sensu\_stricto\_Otu00307*  
*Helcococcus\_Otu00399*  
*Prevotella\_Otu00272*  
*Flavobacterium\_Otu00333*  
*Coprococcus\_Otu00246*  
*Porphyromonadaceae\_unclassified\_63\_\_Otu00417*  
*Prevotella\_Otu00240*  
*Lactobacillus\_Otu00092*  
*Chryseobacterium\_Otu00042*  
*Campylobacter\_Otu00493*  
*Peptococcus\_Otu00407*  
*Vitreoscilla\_93\_\_Otu00391*  
*Psychrobacter\_Otu00012*  
*Peptostreptococcus\_Otu00186*  
*Lachnospiraceae\_unclassified\_Otu00253*  
*Prevotella\_Otu00347*  
*Corynebacterium\_Otu00100*  
*Nosocomiicoccus\_92\_\_Otu00291*  
*Microbacterium\_73\_\_Otu00433*  
*Lachnospiraceae\_unclassified\_Otu00446*  
*Proteocatella\_Otu00348*  
*Treponema\_Otu00449*  
*Sanguibacter\_93\_\_Otu00191*  
*Blautia\_Otu00360*  
*Empedobacter\_Otu00352*  
*Psychrobacter\_Otu00093*  
*Arcobacter\_Otu00273*  
*Peptostreptococcaceae\_unclassified\_98\_\_Otu00452*  
*Facklamia\_92\_\_Otu00130*  
*Butyricicoccus\_Otu00325*  
*Clostridiales\_unclassified\_Otu00131*  
*Prevotella\_Otu00520*  
*Phascolarctobacterium\_Otu00211*

---

*Chryseobacterium*\_Otu00144  
***Bacteroidetes\_unclassified\_Bacteroidetes\_unclassified*\_Otu00370**  
*Clostridium\_XIVa\_75\_\_*Otu00385  
*Porphyromonadaceae\_unclassified*\_Otu00289  
***Coprococcus*\_Otu00424**  
***Moraxella*\_Otu00259**  
*Facklamia\_99\_\_*Otu00254  
***Comamonadaceae\_unclassified\_70\_\_*Otu00050**  
***Kocuria\_95\_\_*Otu00094**  
***Porphyromonadaceae\_unclassified*\_Otu00414**  
***Lactococcus*\_Otu00132**  
*Fastidiosipila*\_Otu00225  
*Firmicutes\_unclassified*\_Otu00256  
***Ruminococcus\_99\_\_*Otu00428**  
*Clostridiales\_unclassified\_88\_\_*Otu00235  
*Porphyromonas*\_Otu00358  
*Bacteroides*\_Otu00241  
***Brevundimonas*\_Otu00101**  
*Roseburia\_96\_\_*Otu00280  
*Clostridiales\_Incertae\_Sedis\_XI\_unclassified*\_Otu00157  
***Lachnospiraceae\_unclassified*\_Otu00364**  
***Sphingopyxis*\_Otu00231**  
***Ruminococcaceae\_unclassified\_85\_\_*Otu00422**  
*Catenibacterium*\_Otu00317  
*Porphyromonadaceae\_unclassified*\_Otu00234  
***Firmicutes\_unclassified\_99\_\_*Otu00546**  
*Prevotella*\_Otu00159  
*Ruminococcaceae\_unclassified\_93\_\_*Otu00153  
*Collinsella*\_Otu00527  
*Blautia*\_Otu00361  
*Ruminococcaceae\_unclassified*\_Otu00427  
*Ruminococcaceae\_unclassified\_97\_\_*Otu00270  
***Mycobacterium*\_Otu00116**  
*Clostridiales\_unclassified\_84\_\_*Otu00321  
***Intestinimonas*\_Otu00402**  
***Butyricicoccus*\_Otu00312**  
***Streptococcus*\_Otu00237**  
***Methanobrevibacter*\_Otu00413**  
***Holdemanella*\_Otu00594**  
***Blautia*\_Otu00392**  

---

*Anaerococcus*\_Otu00202

*Ruminococcaceae\_unclassified\_Otu00287*  
*Prevotella\_Otu00471*  
*Ruminococcaceae\_unclassified\_95\_\_Otu00451*  
*Microbacteriaceae\_unclassified\_91\_\_Otu00135*  
*Porphyromonas\_Otu00223*  
*Clostridium\_sensu\_stricto\_Otu00441*  
*Rhizobium\_Otu00345*  
*Blautia\_98\_\_Otu00381*  
*Collinsella\_Otu00353*  
*Clostridiales\_unclassified\_Otu00326*  
*Peptoniphilus\_Otu00213*  
*Flavobacterium\_Otu00160*  
*Methanosphaera\_Otu00379*  
*Clostridiales\_unclassified\_99\_\_Otu00107*  
*Ruminococcaceae\_unclassified\_Otu00320*  
*Bulleidia\_Otu00450*  
*Actinomycetales\_unclassified\_66\_\_Otu00464*  
*Chryseobacterium\_Otu00064*  
*Azospira\_Otu00476*  
*Exiguobacterium\_99\_\_Otu00127*  
*Ruminococcaceae\_unclassified\_Otu00456*  
*Clostridium\_sensu\_stricto\_Otu00059*  
*Lachnospiraceae\_unclassified\_Otu00069*  
*Ezakiella\_Otu00150*  
*Lachnospiraceae\_unclassified\_Otu00355*  
*Peptoniphilus\_Otu00105*  
*Peptostreptococcaceae\_unclassified\_65\_\_Otu00387*  
*Mitsuokella\_96\_\_Otu00309*  
*Neisseria\_75\_\_Otu00103*  
*Propionispira\_87\_\_Otu00217*  
*Bifidobacterium\_Otu00299*  
*Rhodococcus\_Otu00126*  
*Firmicutes\_unclassified\_Otu00362*  
*Bacteroidales\_unclassified\_Otu00257*  
*Comamonas\_54\_\_Otu00087*  
*Enhydrobacter\_Otu00007*  
*Exiguobacterium\_Otu00334*  
*Ruminococcus\_69\_\_Otu00330*  
*Enterococcus\_77\_\_Otu00071*  
*Prevotella\_Otu00269*  
*Peptococcus\_Otu00149*

---

*Pseudomonas\_Otu00003*  
*Streptococcus\_Otu00024*  
*Flavobacteriaceae\_unclassified\_Otu00316*  
*Pedobacter\_Otu00265*  
*Clostridiales\_Incertae\_Sedis\_XI\_unclassified\_Otu00221*  
*Ruminococcaceae\_unclassified\_Otu00209*  
*Anaerovibrio\_81\_\_Otu00489*

---

FL *Clostridiales\_unclassified\_74\_\_Otu00215*  
*Anaerococcus\_Otu00076*  
*Corynebacterium\_Otu00242*  
*Ezakiella\_Otu00208*  
*Peptoniphilus\_Otu00141*  
*Peptoniphilus\_Otu00105*  
*Porphyromonas\_Otu00152*  
*Clostridiales\_Incertae\_Sedis\_XI\_unclassified\_Otu00250*  
*Anaerococcus\_Otu00216*  
*Clostridiales\_Incertae\_Sedis\_XI\_unclassified\_Otu00157*  
*Ezakiella\_Otu00150*  
*Peptoniphilaceae\_unclassified\_Otu00140*  
*Clostridiales\_Incertae\_Sedis\_XI\_Finegoldia\_Otu00163*  
*Mobiluncus\_Otu00323*  
*Micrococcaceae\_unclassified\_98\_\_Otu00207*  
*Clostridiales\_unclassified\_99\_\_Otu00107*  
*Corynebacterium\_Otu00081*  
*Fastidiosipila\_Otu00225*  
*Aerococcaceae\_unclassified\_Otu00010*  
*Duganella\_96\_\_Otu00106*  
*Peptococcus\_Otu00149*  
*Peptostreptococcaceae\_unclassified\_98\_\_Otu00452*  
*Anaerococcus\_Otu00202*  
*Atopostipes\_Otu00176*  
*Ruminococcaceae\_unclassified\_Otu00154*  
*Anaerococcus\_Otu00383*  
*Phenyllobacterium\_Otu00056*  
*Facklamia\_92\_\_Otu00130*  
*Gemmata\_Otu00236*  
*Facklamia\_99\_\_Otu00254*  
*Porphyromonas\_Otu00358*  
*Collinsella\_Otu00527*  
*Nosocomiicoccus\_92\_\_Otu00291*  
*Clostridiales\_unclassified\_Otu00131*

---

***Xanthomonadaceae\_unclassified\_65\_\_Otu00302***

*Helcococcus\_Otu00399*

*Macroccoccus\_99\_\_Otu00019*

*Clostridium\_sensu\_stricto\_Otu00016*

***Trueperella\_Otu00002***

*Clostridiales\_Incertae\_Sedis\_XI\_unclassified\_Otu00221*

*Methanosphaera\_Otu00379*

*Peptoniphilus\_Otu00213*

---

LO

***Kurthia\_99\_\_Otu00120***

*Enterococcus\_77\_\_Otu00071*

*Phenylobacterium\_Otu00056*

***Bradyrhizobium\_Otu00044***

***Staphylococcus\_99\_\_Otu00008***

***Rothia\_Otu00346***

*Duganella\_96\_\_Otu00106*

*Macroccoccus\_99\_\_Otu00019*

*Aerococcaceae\_unclassified\_Otu00010*

*Corynebacterium\_Otu00081*

***Blactococcus\_Otu00132***

*Gemmata\_Otu00236*

*Peptostreptococcus\_Otu00186*

*Clostridiaceae\_1\_unclassified\_Otu00082*

***Pelomonas\_65\_\_Otu00128***

***Flavobacterium\_Otu00138***

*Enhydrobacter\_Otu00007*

*Clostridium\_sensu\_stricto\_Otu00016*

*Ruminococcaceae\_unclassified\_Otu00154*

*Rothia\_92\_\_Otu00006*

***Nocardioides\_Otu00342***

***Micrococcaceae\_unclassified\_Otu00038***

*Neisseria\_75\_\_Otu00103*

*Ruminococcaceae\_unclassified\_93\_\_Otu00153*

*Clostridiales\_unclassified\_Otu00131*

*Porphyromonadaceae\_unclassified\_84\_\_Otu00220*

*Mobiluncus\_Otu00323*

*Corynebacterium\_Otu00242*

*Chryseobacterium\_Otu00064*

*Romboutsia\_Otu00075*

***Brachybacterium\_99\_\_Otu00151***

*Comamonas\_54\_\_Otu00087*

*Peptoniphilus\_Otu00105*

---

|    |                                                               |
|----|---------------------------------------------------------------|
|    | <i>Janthinobacterium_88__Otu00027</i>                         |
|    | <i>Bacteroides__Otu00241</i>                                  |
|    | <b><i>Veillonella__Otu00111</i></b>                           |
| PI | <i>Psychrobacter__Otu00047</i>                                |
|    | <b><i>Atopobium__Otu00090</i></b>                             |
|    | <i>Rothia_92__Otu00006</i>                                    |
|    | <i>Clostridiaceae_1_unclassified__Otu00082</i>                |
|    | <i>Aerococcaceae_unclassified__Otu00010</i>                   |
|    | <i>Rhodopseudomonas_99__Otu00033</i>                          |
|    | <i>Clostridiales_Incertae_Sedis_XI_unclassified__Otu00157</i> |
|    | <i>Ruminococcaceae_unclassified__Otu00154</i>                 |
|    | <b><i>Flavobacteriaceae_Soonwooa__Otu00196</i></b>            |
|    | <i>Lachnospiraceae_unclassified__Otu00069</i>                 |
|    | <i>Facklamia_92__Otu00130</i>                                 |
|    | <i>Porphyromonas_98__Otu00454</i>                             |
|    | <i>Peptoniphilus__Otu00105</i>                                |
|    | <i>Chryseobacterium__Otu00144</i>                             |
|    | <i>Gallicola__Otu00249</i>                                    |
|    | <i>Empedobacter__Otu00352</i>                                 |
|    | <i>Ruminococcaceae_unclassified__Otu00209</i>                 |
|    | <i>Clostridiales_unclassified_99__Otu00107</i>                |
|    | <i>Helcococcus__Otu00399</i>                                  |
|    | <i>Fastidiosipila__Otu00225</i>                               |
|    | <i>Clostridiales_unclassified__Otu00131</i>                   |
|    | <b><i>Peptostreptococcus__Otu00018</i></b>                    |
|    | <i>Vitreoscilla_93__Otu00391</i>                              |
|    | <i>Clostridiales_unclassified_88__Otu00235</i>                |
|    | <i>Ezakiella__Otu00150</i>                                    |
|    | <i>Microvirgula__Otu00206</i>                                 |
|    | <i>Facklamia_99__Otu00254</i>                                 |
|    | <b><i>Bacteroides__Otu00022</i></b>                           |
|    | <b><i>Clostridium_sensu_stricto_97__Otu00203</i></b>          |
| FE | <i>Psychrobacter__Otu00012</i>                                |
|    | <b><i>Morganella_91__Otu00337</i></b>                         |
|    | <b><i>Escherichia_Shigella__Otu00046</i></b>                  |
|    | <b><i>Carnobacterium_58__Otu00055</i></b>                     |
|    | <i>Catenibacterium__Otu00317</i>                              |
|    | <b><i>Arthrobacter__Otu00063</i></b>                          |
|    | <i>Macrococcus_99__Otu00019</i>                               |
|    | <i>Exiguobacterium_99__Otu00127</i>                           |
|    | <i>Prevotella__Otu00240</i>                                   |
|    | <i>Clostridium_sensu_stricto__Otu00059</i>                    |

*Janthinobacterium\_88\_\_Otu00027*  
*Phascolarctobacterium\_Otu00211*  
*Firmicutes\_unclassified\_Otu00256*  
*Rothia\_92\_\_Otu00006*  
***Ruminococcaceae\_unclassified\_94\_\_Otu00351***  
*Prevotella\_Otu00347*  
*Clostridium\_sensu\_stricto\_Otu00016*  
*Coprococcus\_Otu00246*  
*Ruminococcus\_69\_\_Otu00330*  
*Ruminococcaceae\_unclassified\_93\_\_Otu00153*  
*Bifidobacterium\_Otu00299*  
*Roseburia\_96\_\_Otu00280*  
*Anaerovibrio\_81\_\_Otu00489*  
*Terrisporobacter\_Otu00041*  
*Blautia\_98\_\_Otu00381*  
*Methanobrevibacter\_Otu00183*  
*Lactococcus\_Otu00262*  
*Lachnospiraceae\_unclassified\_Otu00446*  
*Campylobacter\_Otu00493*  
*Ruminococcaceae\_unclassified\_Otu00427*  
*Clostridiaceae\_1\_unclassified\_Otu00082*  
*Porphyromonadaceae\_unclassified\_Otu00289*  
*Clostridiales\_unclassified\_84\_\_Otu00321*  
*Duganella\_96\_\_Otu00106*  
*Prevotella\_Otu00159*  
***Vagococcus\_93\_\_Otu00278***  
*Porphyromonadaceae\_unclassified\_Otu00234*  
*Clostridium\_sensu\_stricto\_Otu00136*  
***BCoprococcus\_Otu00424***  
*Ruminococcaceae\_unclassified\_97\_\_Otu00270*  
*Mitsuokella\_96\_\_Otu00309*  
*Blautia\_Otu00361*  
*Porphyromonadaceae\_unclassified\_84\_\_Otu00220*  
*Clostridium\_XIVa\_75\_\_Otu00385*  
***Aeromonas\_Otu00062***

---

Table S3: OTUs positively associated with production line according to the MaAsLin test. Bacterial genera and OTUs associated with only one production line are identified in bold. CP: Main production line; FL: Belly production line; LO: Loin production line; BO: Boston production line; PI: Picnic production line; FE: Ham production line.
