# Supplementary material for: Distinct Microbiotas Are Associated with Different Production Lines in the Cutting Room of a Swine Slaughterhouse
Source: Microorganisms. 2023 Jan 4;11(1):133. doi: 10.3390/microorganisms11010133 (PMC9862343; doi:10.3390/microorganisms11010133)
Supplement: Supplementary file 1 [file microorganisms-11-00133-s001.zip › Table S4 OTUs negatively associated with production line according to the MaAsLin test.pdf]

| Production<br>line | Bacterial Genus and OTU                              |
|--------------------|------------------------------------------------------|
| CP                 | <i>Fusobacterium</i> _Otu00001                       |
|                    | <i>Mycoplasma</i> _Otu00112                          |
|                    | <b><i>Bacteria_unclassified</i>_Otu00085</b>         |
|                    | <i>Bacteroides</i> _Otu00022                         |
|                    | <i>Porphyromonas</i> _Otu00295                       |
|                    | <i>Helcococcus</i> _Otu00080                         |
|                    | <i>Trueperella</i> _Otu00002                         |
|                    | <i>Porphyromonas</i> _Otu00079                       |
|                    | <i>Eubacterium</i> _Otu00097                         |
|                    | <i>Peptoniphilus</i> _Otu00005                       |
|                    | <i>Acinetobacter</i> _Otu00020                       |
|                    | <i>Pseudomonas</i> _Otu00037                         |
|                    | <b><i>Micrococcaceae_unclassified</i>_Otu00038</b>   |
| FL                 | <i>Pasteurellaceae_unclassified</i> _Otu00034        |
|                    | <i>Moraxella</i> _Otu00045                           |
|                    | <i>Moraxellaceae_unclassified_91__</i> Otu00122      |
|                    | <i>Neisseriaceae_unclassified_99__</i> Otu00065      |
|                    | <i>Porphyromonas_58__</i> Otu00109                   |
|                    | <i>Mycoplasma</i> _Otu00112                          |
|                    | <i>Porphyromonas</i> _Otu00295                       |
|                    | <i>Porphyromonas</i> _Otu00079                       |
|                    | <i>Bacteroidales_unclassified_96__</i> Otu00161      |
|                    | <i>Bacteroidales_unclassified</i> _Otu00188          |
|                    | <i>Corynebacterium_99__</i> Otu00251                 |
|                    | <i>Bacteroides</i> _Otu00022                         |
|                    | <i>Acinetobacter</i> _Otu00011                       |
|                    | <i>Chryseobacterium</i> _Otu00042                    |
|                    | <b><i>Pseudomonas</i>_Otu00003</b>                   |
|                    | <i>Leptotrichiaceae_unclassified</i> _Otu00286       |
|                    | <b><i>Psychrobacter</i>_Otu00012</b>                 |
|                    | <i>Gemella</i> _Otu00134                             |
|                    | <b><i>Porphyromonas</i>_Otu00052</b>                 |
|                    | <i>Flavobacteriaceae_unclassified_99__</i> Otu00155  |
|                    | <i>Porphyromonadaceae_unclassified_99__</i> Otu00089 |
|                    | <i>Bacteria_unclassified</i> _Otu00260               |
|                    | <i>Flavobacteriaceae_unclassified</i> _Otu00316      |
|                    | <i>Lactobacillales_unclassified_98__</i> Otu00356    |
|                    | <i>Chryseobacterium</i> _Otu00025                    |
|                    | <i>Eubacterium</i> _Otu00097                         |

*Rhodopseudomonas\_99\_\_Otu00033*  
*Prevotellaceae\_unclassified\_Otu00248*  
*Clostridiales\_unclassified\_Otu00336*  
*Lachnospiraceae\_unclassified\_Otu00146*  
*Fusobacterium\_Otu00001*  
*Pseudomonas\_Otu00037*  
***Psychrobacter\_Otu00047***  
*Aeromonas\_Otu00062*  
*Porphyromonas\_Otu00032*  
*Helcococcus\_Otu00080*  
*Porphyromonas\_Otu00013*  
*Acinetobacter\_Otu00020*  
*Bacteria\_unclassified\_Otu00118*  
*Fretibacterium\_Otu00263*  
*Coriobacteriaceae\_unclassified\_Otu00110*  
***Fusobacterium\_Otu00086***

---

|    |                                                                                                                                                                                                                                                                                                                                                                                                                                                                                                                                                                                                                                                                                                                                                                                                                                                                                                                                                                                |
|----|--------------------------------------------------------------------------------------------------------------------------------------------------------------------------------------------------------------------------------------------------------------------------------------------------------------------------------------------------------------------------------------------------------------------------------------------------------------------------------------------------------------------------------------------------------------------------------------------------------------------------------------------------------------------------------------------------------------------------------------------------------------------------------------------------------------------------------------------------------------------------------------------------------------------------------------------------------------------------------|
| LO | <i>Bacteroides_Otu00022</i><br><i>Moraxella_Otu00045</i><br><i>Moraxellaceae_unclassified_91__Otu00122</i><br><i>Neisseriaceae_unclassified_99__Otu00065</i><br><i>Fusobacterium_Otu00001</i><br><i>Pasteurellaceae_unclassified_Otu00034</i><br><i>Mycoplasma_Otu00112</i><br><i>Helcococcus_Otu00080</i><br><i>Acinetobacter_Otu00020</i><br><i>Trueperella_Otu00002</i><br><i>Porphyromonas_Otu00295</i><br><i>Porphyromonas_58__Otu00109</i><br><i>Corynebacterium_99__Otu00251</i><br><i>Porphyromonas_Otu00079</i><br><i>Eubacterium_Otu00097</i><br><b><i>Fusobacterium_Otu00102</i></b><br><i>Porphyromonas_Otu00032</i><br><i>Bacteroides_Otu00009</i><br><i>Bacteroidales_unclassified_Otu00188</i><br><b><i>Peptostreptococcus_Otu00018</i></b><br><i>Coriobacteriaceae_unclassified_Otu00110</i><br><i>Porphyromonadaceae_unclassified_99__Otu00089</i><br><i>Porphyromonas_Otu00013</i><br><i>Peptoniphilus_Otu00005</i><br><i>Bacteria_unclassified_Otu00260</i> |
|----|--------------------------------------------------------------------------------------------------------------------------------------------------------------------------------------------------------------------------------------------------------------------------------------------------------------------------------------------------------------------------------------------------------------------------------------------------------------------------------------------------------------------------------------------------------------------------------------------------------------------------------------------------------------------------------------------------------------------------------------------------------------------------------------------------------------------------------------------------------------------------------------------------------------------------------------------------------------------------------|

---

*Acinetobacter*\_Otu00011  
*Bacteroidales\_unclassified\_96\_\_Otu00161*  
*Flavobacteriaceae\_unclassified\_99\_\_Otu00155*  
*Prevotellaceae\_unclassified\_Otu00248*  
*Leptotrichiaceae\_unclassified\_Otu00286*  
*Chryseobacterium\_Otu00042*  
*Lactobacillales\_unclassified\_98\_\_Otu00356*  
*Lachnospiraceae\_unclassified\_Otu00146*  
*Flavobacteriaceae\_unclassified\_Otu00316*  
*Pseudoxanthomonas\_Otu00339*  
*Gemella\_Otu00134*  
*Rhodopseudomonas\_99\_\_Otu00033*  
***Streptococcus\_Otu00237***  
***Filifactor\_Otu00137***  
*Fretibacterium\_Otu00263*

---

PI *Acinetobacter\_Otu00020*  
*Chryseobacterium\_Otu00025*  
***Sphingomonas\_Otu00070***  
***Pseudomonas\_Otu00023***  
*Acinetobacter\_Otu00011*  
***Actinomycetales\_unclassified\_51\_\_Otu00306***  
***Salmonella\_66\_\_Otu00026***  
*Aeromonas\_Otu00062*  
*Porphyromonas\_Otu00295*  
*Pseudoxanthomonas\_Otu00339*  
*Moraxellaceae\_unclassified\_91\_\_Otu00122*  
*Gemella\_Otu00134*  
*Fusobacterium\_Otu00001*  
*Bacteria\_unclassified\_Otu00118*  
***Janthinobacterium\_88\_\_Otu00027***  
*Fretibacterium\_Otu00263*

---

FE *Bacteroides\_Otu00022*  
*Pasteurellaceae\_unclassified\_Otu00034*  
*Helcococcus\_Otu00080*  
*Fusobacterium\_Otu00001*  
*Moraxellaceae\_unclassified\_91\_\_Otu00122*  
*Mycoplasma\_Otu00112*  
*Trueperella\_Otu00002*  
*Eubacterium\_Otu00097*  
*Chryseobacterium\_Otu00025*  


---

*Bacteroides\_Otu00009*

*Porphyromonas\_Otu00295*  
*Moraxella\_Otu00045*  
*Corynebacterium\_99\_\_Otu00251*  
*Bacteria\_unclassified\_Otu00118*  
*Porphyromonas\_Otu00013*  
*Neisseriaceae\_unclassified\_99\_\_Otu00065*  
*Coriobacteriaceae\_unclassified\_Otu00110*  
*Gemella\_Otu00134*  
*Clostridiales\_unclassified\_Otu00336*  
*Porphyromonas\_58\_\_Otu00109*  
*Bacteroidales\_unclassified\_Otu00188*

---

Table S4: OTUs negatively associated with production line according to the MaAsLin test. Bacterial genera and OTUs associated with only one production line are identified in bold. CP: Main production line; FL: Belly production line; LO: Loin production line; BO: Boston production line; PI: Picnic production line; FE: Ham production line.
