# Supplementary material for: Distinct Microbiotas Are Associated with Different Production Lines in the Cutting Room of a Swine Slaughterhouse
Source: Microorganisms. 2023 Jan 4;11(1):133. doi: 10.3390/microorganisms11010133 (PMC9862343; doi:10.3390/microorganisms11010133)
Supplement: Supplementary file 1 [file microorganisms-11-00133-s001.zip › Table S5 OTUs hierarchized according to their mean importance for the identification of a visit in the random forest visit model.pdf]

**Table S5:** OTUs hierarchized according to their mean importance for the identification of a visit in the random forest visit model.

| Rank | OTU      | Bacterial Genus                           | Importance |
|------|----------|-------------------------------------------|------------|
| 1    | Otu00117 | <i>Prevotella</i>                         | 0.00754902 |
| 2    | Otu00015 | <i>Aerococcaceae_unclassified</i>         | 0.00665979 |
| 3    | Otu00014 | <i>Parvimonas</i>                         | 0.00644643 |
| 4    | Otu00344 | <i>Corynebacterium</i>                    | 0.00593278 |
| 5    | Otu00049 | <i>Prevotella</i>                         | 0.00557527 |
| 6    | Otu00066 | <i>Lactobacillales_unclassified</i>       | 0.00547569 |
| 7    | Otu00028 | <i>Porphyromonas</i>                      | 0.00437562 |
| 8    | Otu00017 | <i>Bacteroides</i>                        | 0.00436419 |
| 9    | Otu00069 | <i>Lachnospiraceae_unclassified</i>       | 0.00432695 |
| 10   | Otu00164 | <i>Actinomycetaceae_unclassified</i>      | 0.00389317 |
| 11   | Otu00224 | <i>Bacilli_unclassified</i>               | 0.00382197 |
| 12   | Otu00297 | <i>Bacteria_unclassified</i>              | 0.00373274 |
| 13   | Otu00266 | <i>Peptostreptococcaceae_unclassified</i> | 0.00343795 |
| 14   | Otu00035 | <i>Fusobacterium</i>                      | 0.00318827 |
| 15   | Otu00001 | <i>Fusobacterium</i>                      | 0.00313769 |
| 16   | Otu00018 | <i>Peptostreptococcus</i>                 | 0.00297853 |
| 17   | Otu00046 | <i>Escherichia/Shigella</i>               | 0.002933   |
| 18   | Otu00162 | <i>Photobacterium</i>                     | 0.00292434 |
| 19   | Otu00080 | <i>Helcococcus</i>                        | 0.00286206 |
| 20   | Otu00115 | <i>Mycoplasma</i>                         | 0.00277772 |
| 21   | Otu00160 | <i>Flavobacterium</i>                     | 0.00267869 |
| 22   | Otu00029 | <i>Streptococcus</i>                      | 0.00266186 |
| 23   | Otu00025 | <i>Chryseobacterium</i>                   | 0.00266052 |
| 24   | Otu00005 | <i>Peptoniphilus</i>                      | 0.00265971 |
| 25   | Otu00031 | <i>Epilithonimonas</i>                    | 0.00264622 |
| 26   | Otu00052 | <i>Porphyromonas</i>                      | 0.0025355  |
| 27   | Otu00193 | <i>Porphyromonas</i>                      | 0.00242993 |
| 28   | Otu00009 | <i>Bacteroides</i>                        | 0.00242468 |
| 29   | Otu00181 | <i>Helcococcus</i>                        | 0.00220673 |
| 30   | Otu00230 | <i>Filifactor</i>                         | 0.00214084 |
| 31   | Otu00047 | <i>Psychrobacter</i>                      | 0.00211189 |
| 32   | Otu00097 | <i>Eubacterium</i>                        | 0.00209746 |
| 33   | Otu00030 | <i>Bacteroides</i>                        | 0.00202445 |
| 34   | Otu00197 | <i>Campylobacter</i>                      | 0.00200184 |
| 35   | Otu00404 | <i>Bacteria_unclassified</i>              | 0.0019922  |
| 36   | Otu00022 | <i>Bacteroides</i>                        | 0.00196726 |
| 37   | Otu00336 | <i>Clostridiales_unclassified</i>         | 0.00193741 |
| 38   | Otu00032 | <i>Porphyromonas</i>                      | 0.00185845 |
| 39   | Otu00120 | <i>Kurthia</i>                            | 0.00182929 |

|    |          |                                                     |            |
|----|----------|-----------------------------------------------------|------------|
| 40 | Otu00013 | <i>Porphyromonas</i>                                | 0.00180634 |
| 41 | Otu00062 | <i>Aeromonas</i>                                    | 0.00178152 |
| 42 | Otu00104 | <i>Helcococcus</i>                                  | 0.00175999 |
| 43 | Otu00027 | <i>Janthinobacterium</i>                            | 0.00174556 |
| 44 | Otu00085 | <i>Bacteria_unclassified</i>                        | 0.00174097 |
| 45 | Otu00089 | <i>Porphyromonadaceae_unclassified</i>              | 0.00163324 |
| 46 | Otu00055 | <i>Carnobacterium</i>                               | 0.00162044 |
| 47 | Otu00282 | <i>Bergeyella</i>                                   | 0.00157329 |
| 48 | Otu00078 | <i>Polaromonas</i>                                  | 0.00156524 |
| 49 | Otu00121 | <i>Pasteurella</i>                                  | 0.00156145 |
| 50 | Otu00090 | <i>Atopobium</i>                                    | 0.0015574  |
| 51 | Otu00368 | <i>Schlegelella</i>                                 | 0.00155714 |
| 52 | Otu00218 | <i>Clostridiales_Incertae_Sedis_XI_unclassified</i> | 0.00155259 |
| 53 | Otu00138 | <i>Flavobacterium</i>                               | 0.00153083 |
| 54 | Otu00071 | <i>Enterococcus</i>                                 | 0.00148827 |
| 55 | Otu00020 | <i>Acinetobacter</i>                                | 0.00145952 |
| 56 | Otu00002 | <i>Trueperella</i>                                  | 0.00136781 |
| 57 | Otu00019 | <i>Macrococcus</i>                                  | 0.00134792 |
| 58 | Otu00024 | <i>Streptococcus</i>                                | 0.00134049 |
| 59 | Otu00210 | <i>Tannerella</i>                                   | 0.00132554 |
| 60 | Otu00092 | <i>Lactobacillus</i>                                | 0.00132091 |
| 61 | Otu00235 | <i>Clostridiales_unclassified</i>                   | 0.00131959 |
| 62 | Otu00103 | <i>Neisseria</i>                                    | 0.00130282 |
| 63 | Otu00174 | <i>Xanthobacteraceae_unclassified</i>               | 0.00128876 |
| 64 | Otu00110 | <i>Coriobacteriaceae_unclassified</i>               | 0.00124826 |
| 65 | Otu00037 | <i>Pseudomonas</i>                                  | 0.00123504 |
| 66 | Otu00011 | <i>Acinetobacter</i>                                | 0.00123326 |
| 67 | Otu00016 | <i>Clostridium_sensu_stricto</i>                    | 0.00122564 |
| 68 | Otu00154 | <i>Ruminococcaceae_unclassified</i>                 | 0.00122006 |
| 69 | Otu00084 | <i>Acinetobacter</i>                                | 0.00113304 |
| 70 | Otu00101 | <i>Brevundimonas</i>                                | 0.0011283  |
| 71 | Otu00010 | <i>Aerococcaceae_unclassified</i>                   | 0.00111641 |
| 72 | Otu00133 | <i>Rhodobacteraceae_unclassified</i>                | 0.00109471 |
| 73 | Otu00099 | <i>Lactobacillus</i>                                | 0.00107702 |
| 74 | Otu00056 | <i>Phenylobacterium</i>                             | 0.00107302 |
| 75 | Otu00006 | <i>Rothia</i>                                       | 0.00106707 |
| 76 | Otu00068 | <i>Actinomyces</i>                                  | 0.00105174 |
| 77 | Otu00050 | <i>Comamonadaceae_unclassified</i>                  | 0.00103582 |
| 78 | Otu00122 | <i>Moraxellaceae_unclassified</i>                   | 0.00103328 |
| 79 | Otu00060 | <i>Brevundimonas</i>                                | 0.00101517 |
| 80 | Otu00077 | <i>Rhizobiaceae_unclassified</i>                    | 0.001013   |
| 81 | Otu00007 | <i>Enhydrobacter</i>                                | 0.00101295 |

|     |          |                                                     |            |
|-----|----------|-----------------------------------------------------|------------|
| 82  | Otu00012 | <i>Psychrobacter</i>                                | 0.00098394 |
| 83  | Otu00095 | <i>Lachnospiraceae_unclassified</i>                 | 0.00097684 |
| 84  | Otu00149 | <i>Peptococcus</i>                                  | 0.00094882 |
| 85  | Otu00158 | <i>Sandaracinobacter</i>                            | 0.00093348 |
| 86  | Otu00132 | <i>Lactococcus</i>                                  | 0.00091831 |
| 87  | Otu00107 | <i>Clostridiales_unclassified</i>                   | 0.00090597 |
| 88  | Otu00221 | <i>Clostridiales_Incertae_Sedis_XI_unclassified</i> | 0.00088122 |
| 89  | Otu00082 | <i>Clostridiaceae_1_unclassified</i>                | 0.00086872 |
| 90  | Otu00064 | <i>Chryseobacterium</i>                             | 0.0008601  |
| 91  | Otu00517 | <i>Micrococcaceae_unclassified</i>                  | 0.00085327 |
| 92  | Otu00332 | <i>Odoribacter</i>                                  | 0.00084379 |
| 93  | Otu00245 | <i>Brochothrix</i>                                  | 0.00084185 |
| 94  | Otu00112 | <i>Mycoplasma</i>                                   | 0.00083828 |
| 95  | Otu00377 | <i>Catonella</i>                                    | 0.00083762 |
| 96  | Otu00139 | <i>Amaricoccus</i>                                  | 0.00083541 |
| 97  | Otu00008 | <i>Staphylococcus</i>                               | 0.00081037 |
| 98  | Otu00102 | <i>Fusobacterium</i>                                | 0.00079038 |
| 99  | Otu00354 | <i>Flavobacterium</i>                               | 0.00078212 |
| 100 | Otu00651 | <i>Lachnoanaerobaculum</i>                          | 0.00076333 |
| 101 | Otu00036 | <i>Paracoccus</i>                                   | 0.00076203 |
| 102 | Otu00091 | <i>Flavobacteriaceae_unclassified</i>               | 0.00075036 |
| 103 | Otu00042 | <i>Chryseobacterium</i>                             | 0.00073935 |
| 104 | Otu00079 | <i>Porphyromonas</i>                                | 0.00073418 |
| 105 | Otu01118 | <i>Bacteroides</i>                                  | 0.00071537 |
| 106 | Otu00137 | <i>Filifactor</i>                                   | 0.00071361 |
| 107 | Otu00240 | <i>Prevotella</i>                                   | 0.00071091 |
| 108 | Otu00130 | <i>Facklamia</i>                                    | 0.00070741 |
| 109 | Otu00004 | <i>Acinetobacter</i>                                | 0.00070477 |
| 110 | Otu00086 | <i>Fusobacterium</i>                                | 0.00069306 |
| 111 | Otu00106 | <i>Duganella</i>                                    | 0.00067246 |
| 112 | Otu00044 | <i>Bradyrhizobium</i>                               | 0.00067243 |
| 113 | Otu00065 | <i>Neisseriaceae_unclassified</i>                   | 0.00067192 |
| 114 | Otu00124 | <i>Rhodobacteraceae_unclassified</i>                | 0.00067156 |
| 115 | Otu00150 | <i>Ezakiella</i>                                    | 0.00067001 |
| 116 | Otu00222 | <i>Aquabacterium</i>                                | 0.00065927 |
| 117 | Otu00105 | <i>Peptoniphilus</i>                                | 0.00065815 |
| 118 | Otu00054 | <i>Stenotrophomonas</i>                             | 0.00065796 |
| 119 | Otu00034 | <i>Pasteurellaceae_unclassified</i>                 | 0.0006539  |
| 120 | Otu00053 | <i>Aerococcus</i>                                   | 0.00065133 |
| 121 | Otu00061 | <i>Bacillales_unclassified</i>                      | 0.00064722 |
| 122 | Otu00113 | <i>Treponema</i>                                    | 0.00064583 |
| 123 | Otu00087 | <i>Comamonas</i>                                    | 0.00062164 |

|     |          |                                        |            |
|-----|----------|----------------------------------------|------------|
| 124 | Otu00187 | <i>Actinobacillus</i>                  | 0.00062127 |
| 125 | Otu00003 | <i>Pseudomonas</i>                     | 0.00061036 |
| 126 | Otu00146 | <i>Lachnospiraceae_unclassified</i>    | 0.00060903 |
| 127 | Otu00131 | <i>Clostridiales_unclassified</i>      | 0.0006051  |
| 128 | Otu00063 | <i>Arthrobacter</i>                    | 0.00060124 |
| 129 | Otu00048 | <i>Sphingobium</i>                     | 0.00059025 |
| 130 | Otu00033 | <i>Rhodopseudomonas</i>                | 0.00055931 |
| 131 | Otu00039 | <i>Yersinia</i>                        | 0.00055649 |
| 132 | Otu00295 | <i>Porphyromonas</i>                   | 0.00054895 |
| 133 | Otu00045 | <i>Moraxella</i>                       | 0.00053853 |
| 134 | Otu00209 | <i>Ruminococcaceae_unclassified</i>    | 0.00051859 |
| 135 | Otu00159 | <i>Prevotella</i>                      | 0.00051373 |
| 136 | Otu00220 | <i>Porphyromonadaceae_unclassified</i> | 0.000513   |
| 137 | Otu00207 | <i>Micrococcaceae_unclassified</i>     | 0.0004654  |
| 138 | Otu00173 | <i>Pseudomonas</i>                     | 0.00045048 |
| 139 | Otu00213 | <i>Peptoniphilus</i>                   | 0.00044002 |
| 140 | Otu00023 | <i>Pseudomonas</i>                     | 0.0004394  |
| 141 | Otu00134 | <i>Gemella</i>                         | 0.00042595 |
| 142 | Otu00415 | <i>Massilia</i>                        | 0.00036034 |
| 143 | Otu00305 | <i>Tepidimonas</i>                     | 0.00033182 |

---

Column: 1 – Rank of importance of the OTU in the prediction of a sample belonging to a particular visit; 2- OUT number; 3- Bacterial genus; 4- median of the decrease in accuracy (mean decrease in Gini coefficient) when an OTU is removed from the model among the 100 replications of random forest.
