# Supplementary material for: Distinct Microbiotas Are Associated with Different Production Lines in the Cutting Room of a Swine Slaughterhouse
Source: Microorganisms. 2023 Jan 4;11(1):133. doi: 10.3390/microorganisms11010133 (PMC9862343; doi:10.3390/microorganisms11010133)
Supplement: Supplementary file 1 [file microorganisms-11-00133-s001.zip › Table S6 OTUs hierarchized according to their mean importance for the identification of a production line in the random forest production line model.pdf]

Table S6: OTUs hierarchized according to their mean importance for the identification of a production line in the random forest production line model.

| Rank | OTUs     | Bacterial Genus                      | Importance |
|------|----------|--------------------------------------|------------|
| 1    | Otu00045 | <i>Moraxella</i>                     | 0,00755239 |
| 2    | Otu00065 | <i>Neisseriaceae_unclassified</i>    | 0,00715058 |
| 3    | Otu00019 | <i>Macrococcus</i>                   | 0,0070928  |
| 4    | Otu00006 | <i>Rothia</i> (92)                   | 0,00682821 |
| 5    | Otu00012 | <i>Psychrobacter</i>                 | 0,00629334 |
| 6    | Otu00022 | <i>Bacteroides</i>                   | 0,00586198 |
| 7    | Otu00033 | <i>Rhodopseudomonas</i>              | 0,00524286 |
| 8    | Otu00034 | <i>Pasteurellaceae_unclassified</i>  | 0,00496341 |
| 9    | Otu00002 | <i>Trueperella</i>                   | 0,00472953 |
| 10   | Otu00076 | <i>Anaerococcus</i>                  | 0,00413672 |
| 11   | Otu00122 | <i>Moraxellaceae_unclassified</i>    | 0,00396747 |
| 12   | Otu00042 | <i>Chryseobacterium</i>              | 0,00376229 |
| 13   | Otu00020 | <i>Acinetobacter</i>                 | 0,00349835 |
| 14   | Otu00059 | <i>Clostridium_sensu_stricto</i>     | 0,0033976  |
| 15   | Otu00249 | <i>Gallicola</i>                     | 0,00333676 |
| 16   | Otu00109 | <i>Porphyromonas</i>                 | 0,00321097 |
| 17   | Otu00215 | <i>Clostridiales_unclassified</i>    | 0,00312908 |
| 18   | Otu00005 | <i>Peptoniphilus</i>                 | 0,00301631 |
| 19   | Otu00014 | <i>Parvimonas</i>                    | 0,00288531 |
| 20   | Otu00242 | <i>Corynebacterium</i>               | 0,00286469 |
| 21   | Otu00003 | <i>Pseudomonas</i>                   | 0,00281765 |
| 22   | Otu00208 | <i>Ezakiella</i>                     | 0,00269735 |
| 23   | Otu00082 | <i>Clostridiaceae_1_unclassified</i> | 0,00267705 |
| 24   | Otu00011 | <i>Acinetobacter</i>                 | 0,00267208 |
| 25   | Otu00120 | <i>Kurthia</i>                       | 0,00265106 |
| 26   | Otu00175 | <i>Dechloromonas</i>                 | 0,00259474 |
| 27   | Otu00008 | <i>Staphylococcus</i>                | 0,00259435 |
| 28   | Otu00047 | <i>Psychrobacter</i>                 | 0,00256874 |
| 29   | Otu00055 | <i>Carnobacterium</i>                | 0,00255095 |
| 30   | Otu00018 | <i>Peptostreptococcus</i>            | 0,0025103  |
| 31   | Otu00232 | <i>Streptococcus</i>                 | 0,00250622 |
| 32   | Otu00281 | <i>Desulfovibrio</i>                 | 0,00239995 |
| 33   | Otu00063 | <i>Arthrobacter</i>                  | 0,00239343 |
| 34   | Otu00105 | <i>Peptoniphilus</i>                 | 0,00236185 |
| 35   | Otu00079 | <i>Porphyromonas</i>                 | 0,00233519 |
| 36   | Otu00141 | <i>Peptoniphilus</i>                 | 0,00232642 |
| 37   | Otu00258 | <i>Bacteroides</i>                   | 0,00225725 |
| 38   | Otu00112 | <i>Mycoplasma</i>                    | 0,00218713 |
| 39   | Otu00453 | <i>Bacteroidetes_unclassified</i>    | 0,00217711 |

|    |          |                                                     |            |
|----|----------|-----------------------------------------------------|------------|
| 40 | Otu00196 | <i>Soonwooa</i>                                     | 0,00214222 |
| 41 | Otu00054 | <i>Stenotrophomonas</i>                             | 0,00213316 |
| 42 | Otu00010 | <i>Aerococcaceae_unclassified</i>                   | 0,00212038 |
| 43 | Otu00201 | <i>Flavobacteriaceae_unclassified</i>               | 0,00205318 |
| 44 | Otu00023 | <i>Pseudomonas</i>                                  | 0,00203361 |
| 45 | Otu00188 | <i>Bacteroidales_unclassified</i>                   | 0,00203197 |
| 46 | Otu00027 | <i>Janthinobacterium</i>                            | 0,00199127 |
| 47 | Otu00458 | <i>Mannheimia</i>                                   | 0,00195721 |
| 48 | Otu00009 | <i>Bacteroides</i>                                  | 0,00192371 |
| 49 | Otu00071 | <i>Enterococcus</i>                                 | 0,00192169 |
| 50 | Otu00515 | <i>Lactobacillales_unclassified</i>                 | 0,00187147 |
| 51 | Otu00090 | <i>Atopobium</i>                                    | 0,00182341 |
| 52 | Otu00016 | <i>Clostridium_sensu_stricto</i>                    | 0,00173585 |
| 53 | Otu00025 | <i>Chryseobacterium</i>                             | 0,00168543 |
| 54 | Otu00062 | <i>Aeromonas</i>                                    | 0,00168175 |
| 55 | Otu00080 | <i>Helcococcus</i>                                  | 0,0016784  |
| 56 | Otu00166 | <i>Paludibacter</i>                                 | 0,00166812 |
| 57 | Otu00409 | <i>Leucobacter</i>                                  | 0,00166659 |
| 58 | Otu00056 | <i>Phenylobacterium</i>                             | 0,00165141 |
| 59 | Otu00393 | <i>Acidaminococcus</i>                              | 0,00161787 |
| 60 | Otu00163 | <i>Finegoldia</i>                                   | 0,00160598 |
| 61 | Otu00127 | <i>Exiguobacterium</i>                              | 0,00160188 |
| 62 | Otu00152 | <i>Porphyromonas</i>                                | 0,00158718 |
| 63 | Otu00161 | <i>Bacteroidales_unclassified</i>                   | 0,00158152 |
| 64 | Otu00490 | <i>Coriobacteriaceae_unclassified</i>               | 0,00153199 |
| 65 | Otu00615 | <i>Desulfovibrio</i>                                | 0,00152779 |
| 66 | Otu00461 | <i>Deinococcus</i>                                  | 0,00145036 |
| 67 | Otu00240 | <i>Prevotella</i>                                   | 0,00143422 |
| 68 | Otu00081 | <i>Corynebacterium</i>                              | 0,00142584 |
| 69 | Otu00285 | <i>Rhodocyclaceae_unclassified</i>                  | 0,00140776 |
| 70 | Otu00140 | <i>Peptoniphilaceae_unclassified</i>                | 0,00140308 |
| 71 | Otu00373 | <i>Propionivibrio</i>                               | 0,00140222 |
| 72 | Otu00477 | <i>Sulfurospirillum</i>                             | 0,00138963 |
| 73 | Otu00017 | <i>Bacteroides</i>                                  | 0,00138454 |
| 74 | Otu00262 | <i>Lactococcus</i>                                  | 0,0013752  |
| 75 | Otu00001 | <i>Fusobacterium</i>                                | 0,00135314 |
| 76 | Otu00157 | <i>Clostridiales_Incertae_Sedis_XI_unclassified</i> | 0,00134758 |
| 77 | Otu00041 | <i>Terrisporobacter</i>                             | 0,00131979 |
| 78 | Otu00375 | <i>Bacteroidales_unclassified</i>                   | 0,00131511 |
| 79 | Otu00199 | <i>Bacteroides</i>                                  | 0,00129308 |
| 80 | Otu00044 | <i>Bradyrhizobium</i>                               | 0,00128157 |
| 81 | Otu00039 | <i>Yersinia</i>                                     | 0,00126017 |
| 82 | Otu00028 | <i>Porphyromonas</i>                                | 0,00125809 |

|     |          |                                       |            |
|-----|----------|---------------------------------------|------------|
| 83  | Otu00251 | <i>Corynebacterium</i>                | 0,001254   |
| 84  | Otu00052 | <i>Porphyromonas</i>                  | 0,00123527 |
| 85  | Otu00070 | <i>Sphingomonas</i>                   | 0,0012286  |
| 86  | Otu00099 | <i>Lactobacillus</i>                  | 0,00122703 |
| 87  | Otu00013 | <i>Porphyromonas</i>                  | 0,0012258  |
| 88  | Otu00316 | <i>Flavobacteriaceae_unclassified</i> | 0,00121006 |
| 89  | Otu00032 | <i>Porphyromonas</i>                  | 0,00120761 |
| 90  | Otu00206 | <i>Microvirgula</i>                   | 0,00118001 |
| 91  | Otu00155 | <i>Flavobacteriaceae_unclassified</i> | 0,00116817 |
| 92  | Otu00069 | <i>Lachnospiraceae_unclassified</i>   | 0,00116382 |
| 93  | Otu00058 | <i>Turicibacter</i>                   | 0,00116148 |
| 94  | Otu00264 | <i>Bacteroides</i>                    | 0,0011565  |
| 95  | Otu00150 | <i>Ezakiella</i>                      | 0,00114923 |
| 96  | Otu00078 | <i>Polaromonas</i>                    | 0,00111556 |
| 97  | Otu00391 | <i>Vitreoscilla</i>                   | 0,00110177 |
| 98  | Otu00102 | <i>Fusobacterium</i>                  | 0,00108047 |
| 99  | Otu00097 | <i>Eubacterium</i>                    | 0,00107498 |
| 100 | Otu00576 | <i>Petrimonas</i>                     | 0,00107408 |
| 101 | Otu00406 | <i>Actinomycetaceae_unclassified</i>  | 0,00106972 |
| 102 | Otu00172 | <i>Cloacibacterium</i>                | 0,00104756 |
| 103 | Otu00259 | <i>Moraxella</i>                      | 0,00103668 |
| 104 | Otu00447 | <i>Bacteria_unclassified</i>          | 0,00103381 |
| 105 | Otu00154 | <i>Ruminococcaceae_unclassified</i>   | 0,00103342 |
| 106 | Otu00664 | <i>Synergistaceae_unclassified</i>    | 0,00103071 |
| 107 | Otu00317 | <i>Catenibacterium</i>                | 0,0010273  |
| 108 | Otu00136 | <i>Clostridium_sensu_stricto</i>      | 0,00102662 |
| 109 | Otu00237 | <i>Streptococcus</i>                  | 0,00101221 |
| 110 | Otu00606 | <i>Synergistaceae_unclassified</i>    | 0,00098553 |
| 111 | Otu00298 | <i>Clostridiales_unclassified</i>     | 0,00097175 |
| 112 | Otu00049 | <i>Prevotella</i>                     | 0,00095805 |
| 113 | Otu00197 | <i>Campylobacter</i>                  | 0,00095794 |
| 114 | Otu00537 | <i>Brachymonas</i>                    | 0,00095132 |
| 115 | Otu00015 | <i>Aerococcaceae_unclassified</i>     | 0,00095121 |
| 116 | Otu00110 | <i>Coriobacteriaceae_unclassified</i> | 0,00095112 |
| 117 | Otu00454 | <i>Porphyromonas</i>                  | 0,00094579 |
| 118 | Otu00106 | <i>Duganella</i>                      | 0,00094553 |
| 119 | Otu00203 | <i>Clostridium_sensu_stricto</i>      | 0,00093991 |
| 120 | Otu00359 | <i>Bacteroidetes_unclassified</i>     | 0,00092562 |
| 121 | Otu00035 | <i>Fusobacterium</i>                  | 0,00090469 |
| 122 | Otu00104 | <i>Helcococcus</i>                    | 0,00090286 |
| 123 | Otu00186 | <i>Peptostreptococcus</i>             | 0,00089187 |
| 124 | Otu00193 | <i>Porphyromonas</i>                  | 0,00088142 |
| 125 | Otu00211 | <i>Phascolarctobacterium</i>          | 0,00087206 |

|     |          |                                                     |            |
|-----|----------|-----------------------------------------------------|------------|
| 126 | Otu00130 | <i>Facklamia</i>                                    | 0,00086857 |
| 127 | Otu00526 | <i>Lachnospiraceae_unclassified</i>                 | 0,00086839 |
| 128 | Otu00089 | <i>Porphyromonadaceae_unclassified</i>              | 0,0008669  |
| 129 | Otu00075 | <i>Romboutsia</i>                                   | 0,00084347 |
| 130 | Otu00480 | <i>Flavobacterium</i>                               | 0,00084301 |
| 131 | Otu00225 | <i>Fastidiosipila</i>                               | 0,00083872 |
| 132 | Otu00510 | <i>Telmatospirillum</i>                             | 0,00081654 |
| 133 | Otu00253 | <i>Lachnospiraceae_unclassified</i>                 | 0,00081054 |
| 134 | Otu00138 | <i>Flavobacterium</i>                               | 0,00081005 |
| 135 | Otu00142 | <i>Brevibacterium</i>                               | 0,00080723 |
| 136 | Otu00207 | <i>Micrococcaceae_unclassified</i>                  | 0,00080632 |
| 137 | Otu00624 | <i>Synergistaceae_unclassified</i>                  | 0,00079537 |
| 138 | Otu00107 | <i>Clostridiales_unclassified</i>                   | 0,00078719 |
| 139 | Otu00093 | <i>Psychrobacter</i>                                | 0,00078295 |
| 140 | Otu00159 | <i>Prevotella</i>                                   | 0,0007544  |
| 141 | Otu00085 | <i>Bacteria_unclassified</i>                        | 0,00075285 |
| 142 | Otu00337 | <i>Morganella</i>                                   | 0,00074823 |
| 143 | Otu00118 | <i>Bacteria_unclassified</i>                        | 0,00073945 |
| 144 | Otu00518 | <i>Alphaproteobacteria_unclassified</i>             | 0,00073545 |
| 145 | Otu00260 | <i>Bacteria_unclassified</i>                        | 0,00072761 |
| 146 | Otu00216 | <i>Anaerococcus</i>                                 | 0,00070862 |
| 147 | Otu00116 | <i>Mycobacterium</i>                                | 0,00070682 |
| 148 | Otu00202 | <i>Anaerococcus</i>                                 | 0,000704   |
| 149 | Otu00482 | <i>Bacteroidales_unclassified</i>                   | 0,00070046 |
| 150 | Otu00115 | <i>Mycoplasma</i>                                   | 0,00069574 |
| 151 | Otu00179 | <i>Pseudomonas</i>                                  | 0,00068442 |
| 152 | Otu00322 | <i>Azonexus</i>                                     | 0,00068263 |
| 153 | Otu00486 | <i>Flavobacterium</i>                               | 0,00068001 |
| 154 | Otu00231 | <i>Sphingopyxis</i>                                 | 0,00067664 |
| 155 | Otu00088 | <i>Streptococcus</i>                                | 0,00067636 |
| 156 | Otu00029 | <i>Streptococcus</i>                                | 0,00067517 |
| 157 | Otu00250 | <i>Clostridiales_Incertae_Sedis_XI_unclassified</i> | 0,00067288 |
| 158 | Otu00468 | <i>Pseudomonas</i>                                  | 0,00066168 |
| 159 | Otu00351 | <i>Ruminococcaceae_unclassified</i>                 | 0,00064984 |
| 160 | Otu00516 | <i>Macellibacteroides</i>                           | 0,00064831 |
| 161 | Otu00046 | <i>Escherichia/Shigella</i>                         | 0,00063966 |
| 162 | Otu00217 | <i>Propionispira</i>                                | 0,00063472 |
| 163 | Otu00347 | <i>Prevotella</i>                                   | 0,00062642 |
| 164 | Otu00031 | <i>Epilithonimonas</i>                              | 0,00060814 |
| 165 | Otu00131 | <i>Clostridiales_unclassified</i>                   | 0,00060486 |
| 166 | Otu00703 | <i>Lachnospiraceae_unclassified</i>                 | 0,00059495 |
| 167 | Otu00400 | <i>Clostridiales_unclassified</i>                   | 0,00059451 |
| 168 | Otu00068 | <i>Actinomyces</i>                                  | 0,00057723 |

|     |          |                                      |            |
|-----|----------|--------------------------------------|------------|
| 169 | Otu00363 | <i>Dysgonomonas</i>                  | 0,000569   |
| 170 | Otu00503 | <i>Proteiniclasticum</i>             | 0,00056821 |
| 171 | Otu00134 | <i>Gemella</i>                       | 0,00056605 |
| 172 | Otu00030 | <i>Bacteroides</i>                   | 0,0005535  |
| 173 | Otu00313 | <i>Lactobacillus</i>                 | 0,0005428  |
| 174 | Otu00026 | <i>Salmonella</i>                    | 0,00053659 |
| 175 | Otu00132 | <i>Lactococcus</i>                   | 0,00051584 |
| 176 | Otu00611 | <i>Bacteroidales_unclassified</i>    | 0,00050892 |
| 177 | Otu00233 | <i>Campylobacter</i>                 | 0,0005029  |
| 178 | Otu00164 | <i>Actinomycetaceae_unclassified</i> | 0,00049325 |
| 179 | Otu00153 | <i>Ruminococcaceae_unclassified</i>  | 0,00048525 |
| 180 | Otu00603 | <i>Cellulomonas</i>                  | 0,00048046 |
| 181 | Otu00223 | <i>Porphyromonas</i>                 | 0,00043022 |
| 182 | Otu00581 | <i>Veillonellaceae_unclassified</i>  | 0,00040995 |

---

Column: 1 – Rank of importance of the OTU in the prediction of a sample belonging to a particular production line; 2- OTU number; 3- Bacterial genus; 4- median of the decrease in accuracy (mean decrease in Gini coefficient) when an OTU is removed from the model among the 100 replications of random forest.
